# Supplementary material for: Seasonal Shift in Physicochemical Factors Revealed the Ecological Variables that Modulate the Density of Acinetobacter Species in Freshwater Resources
Source: MDPI journal article supplement (doi:10.3390/ijerph17103606), 2020-05-21
Supplement: s1 [file s1]

## Supplementary Materials

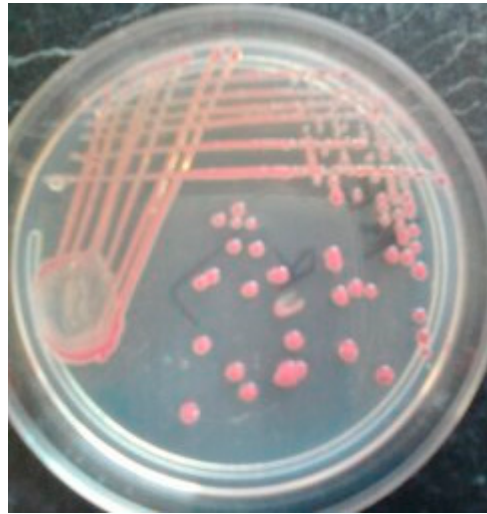

**Figure S1.** Pure culture of presumptive *Acinetobacter* species streaked on CHROMagar selective medium for the genus *Acinetobacter*: (A) Great fish (B) Keiskamma and (C) Tyhume Rivers. Seasons: Autumn - April and May; Winter - June, July, and August; Spring - September and October; Summer - November, December, January, February, and March.

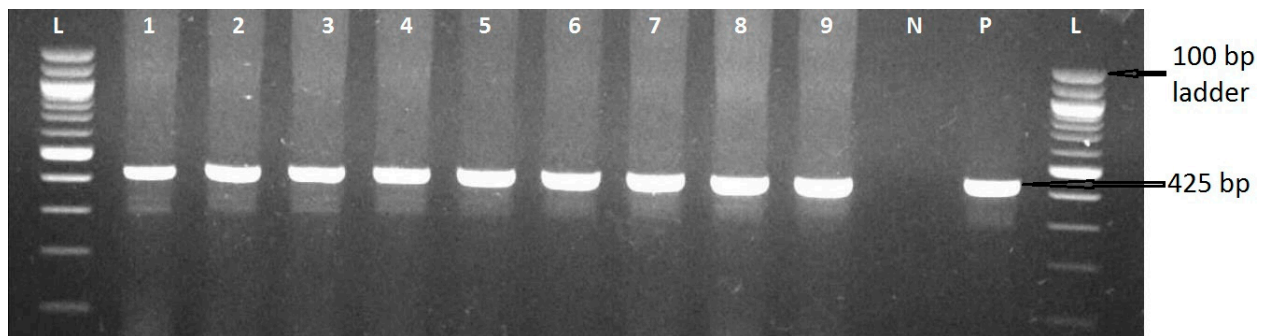

**Figure S2.** Gel electrophoresis of confirmed *Acinetobacter* species. PCR assay resolved by gel electrophoresis showing confirmed *Acinetobacter* spp. targeting the *recA* gene at 425 bp. L = DNA Ladder (100bp); Lane 1 to 9 = Selected *Acinetobacter* isolates; N = Negative control; P = Positive control (*A. baumannii*, DSM Number: 102929).
